# Supplementary material for: Few-Layer MoSe2 Possessing High Catalytic Activity towards Iodide/Tri-iodide Redox Shuttles
Source: PubMed Central journal article supplement — Sci Rep. 2014 Feb 14;4:4063. doi: 10.1038/srep04063 (PMC3924216; doi:10.1038/srep04063), 2014-02-14
Supplement: srep04063-s1.pdf [file srep04063-s1.pdf]

## **Supplementary Information**

### **Few-Layer MoSe<sub>2</sub> Possessing High Catalytic Activity towards Iodide/Tri-iodide Redox Shuttles**

Lawrence Tien Lin Lee, Jian He, Baohua Wang, Yaping Ma, King Young Wong, Quan Li,  
Xudong Xiao and Tao Chen\*

Department of Physics, The Chinese University of Hong Kong, Shatin N. T., Hong Kong,  
P. R. China

Corresponding author email address: [taochen@phy.cuhk.edu.hk](mailto:taochen@phy.cuhk.edu.hk)

**Sheet resistance measurement of the counter electrodes mentioned in the main text.**

**Method:**

The sheet resistances were measured by using Van der Pauw method. Briefly, 4 electrodes were connected to the 4 corners of the rectangular CE, then a current  $i$  was conducted through one pair of electrodes and the potential difference  $V$  was measured from the opposite pair of electrodes. A resistance value can be obtained by dividing  $V$  by  $i$ . Four such resistance values were obtained for the horizontal (e.g. parallel to the longer side of the rectangle) current flows in four different configurations respectively (i.e. via different current path and direction), and another four were obtained for the vertical (e.g. parallel to the shorter side) current flows. Averaged values  $R_{hor}$  and  $R_{vert}$  were calculated and plugged into the following equation, from which the sheet resistance  $R_{sheet}$  of the CE can be found numerically.

$$e^{-\frac{\pi R_{hor}}{R_{sheet}}} + e^{-\frac{\pi R_{vert}}{R_{sheet}}} = 1$$

**Results:**

| CE                          | Sheet Resistance ( $\Omega/\text{sq}$ ) |
|-----------------------------|-----------------------------------------|
| MoSe <sub>2</sub> /Mo/Glass | 0.29                                    |
| MoS <sub>2</sub> /Mo/Glass  | 0.37                                    |
| Pt/FTO/Glass                | 12.60                                   |
| FTO/Glass                   | 12.93                                   |
| Mo/Glass                    | 0.26                                    |

Supporting Figures:

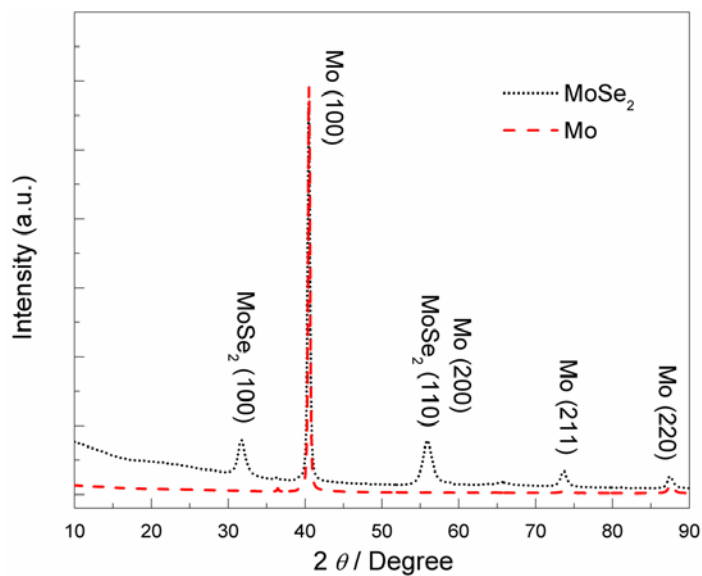

Figure S1| XRD of Mo and few-layer MoSe<sub>2</sub> onto the Mo glass.

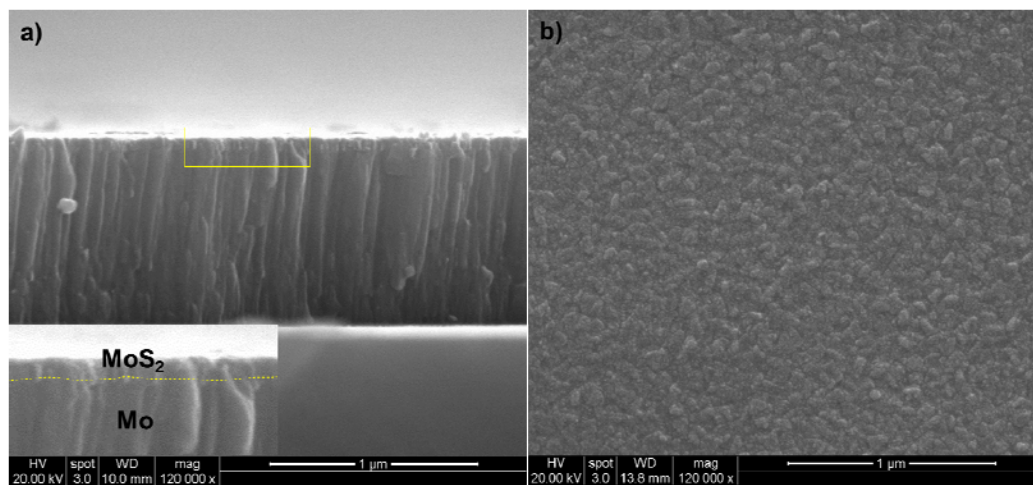

Figure S2| SEM images of the (a) cross-section and (b) surface morphology of the sulfurized Mo-coated soda-lime glass, i.e. MoS<sub>2</sub> on Mo/glass.

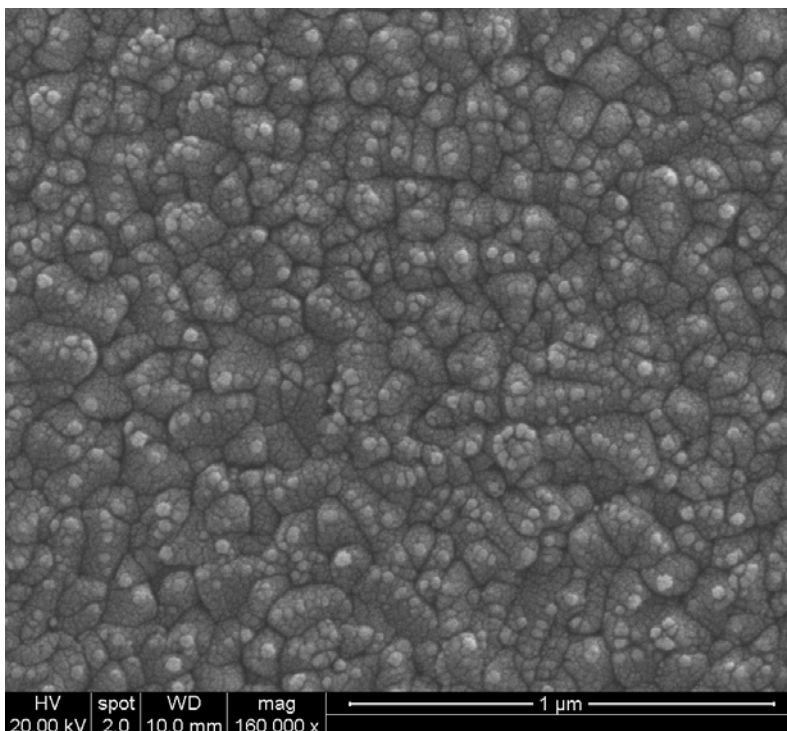

Figure S3| SEM image of Pt sputtered FTO/glass surface.

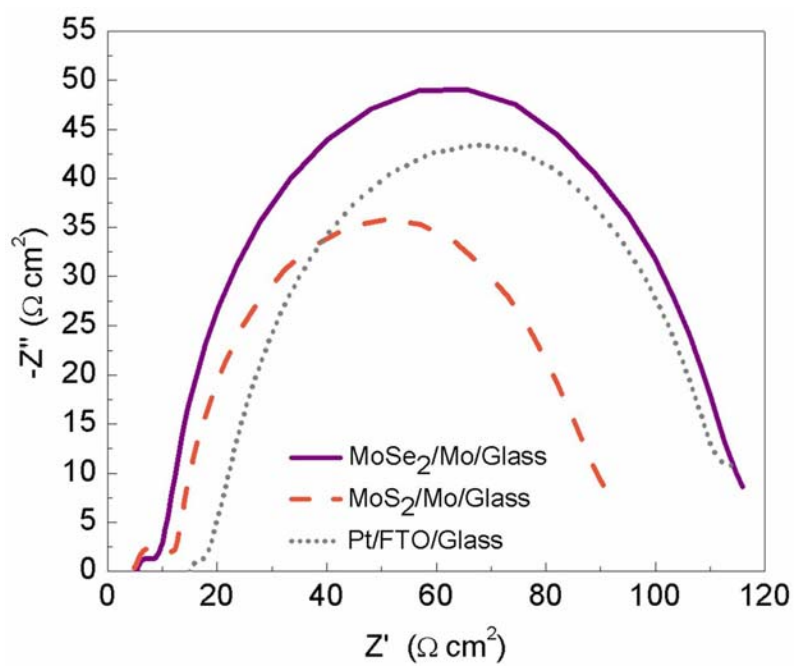

Figure S4| Nyquist plot of DSSC devices using MoSe<sub>2</sub> and MoS<sub>2</sub> on Mo/glass and Pt on FTO as counter electrodes.

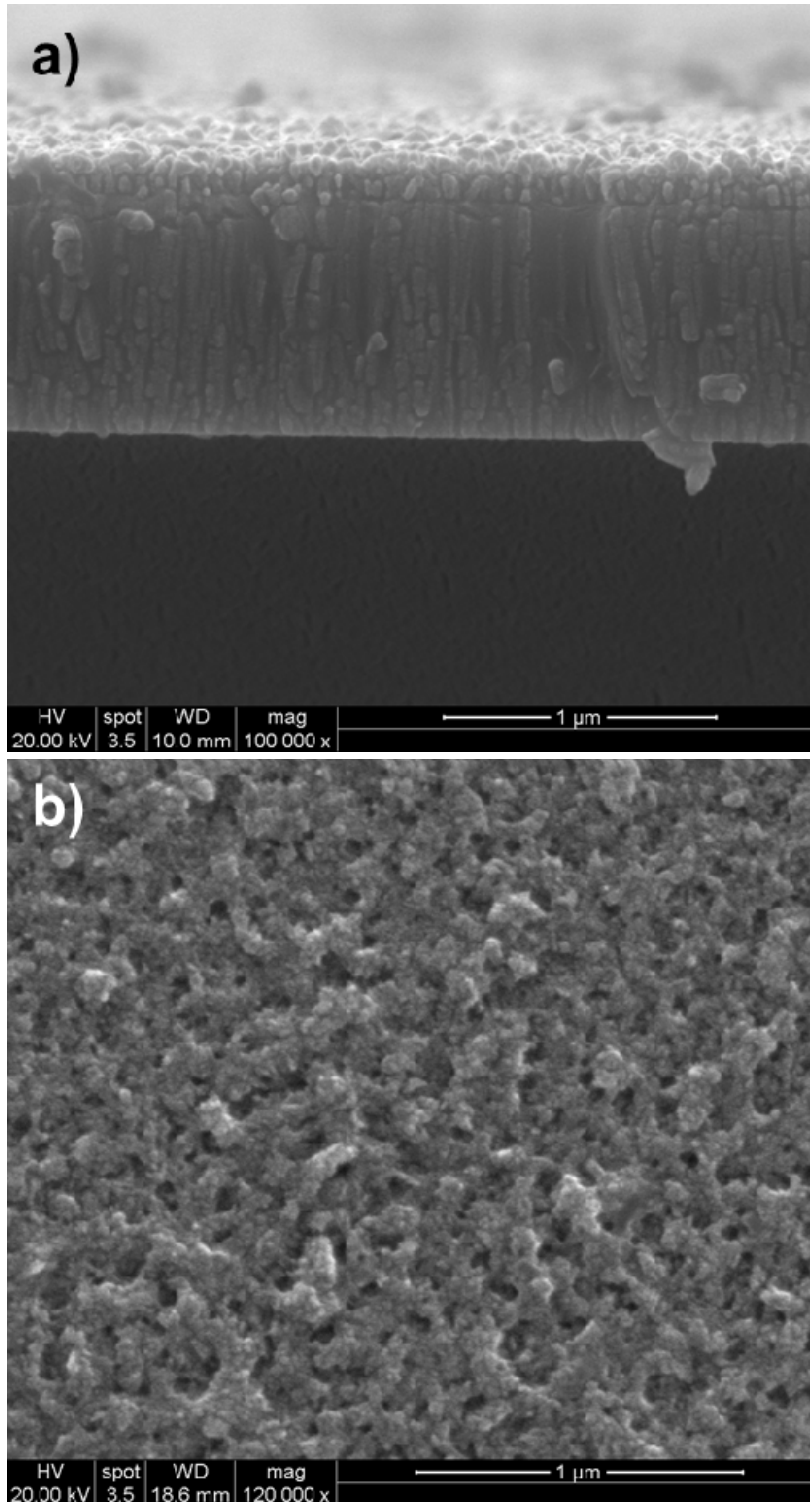

Figure S5| SEM images of (a) cross-section and (b) surface morphology of the heavily selenized Mo/glass (580 °C for 120 min), i.e. a thick layer of MoSe<sub>2</sub> on the surface of Mo-coated glass.

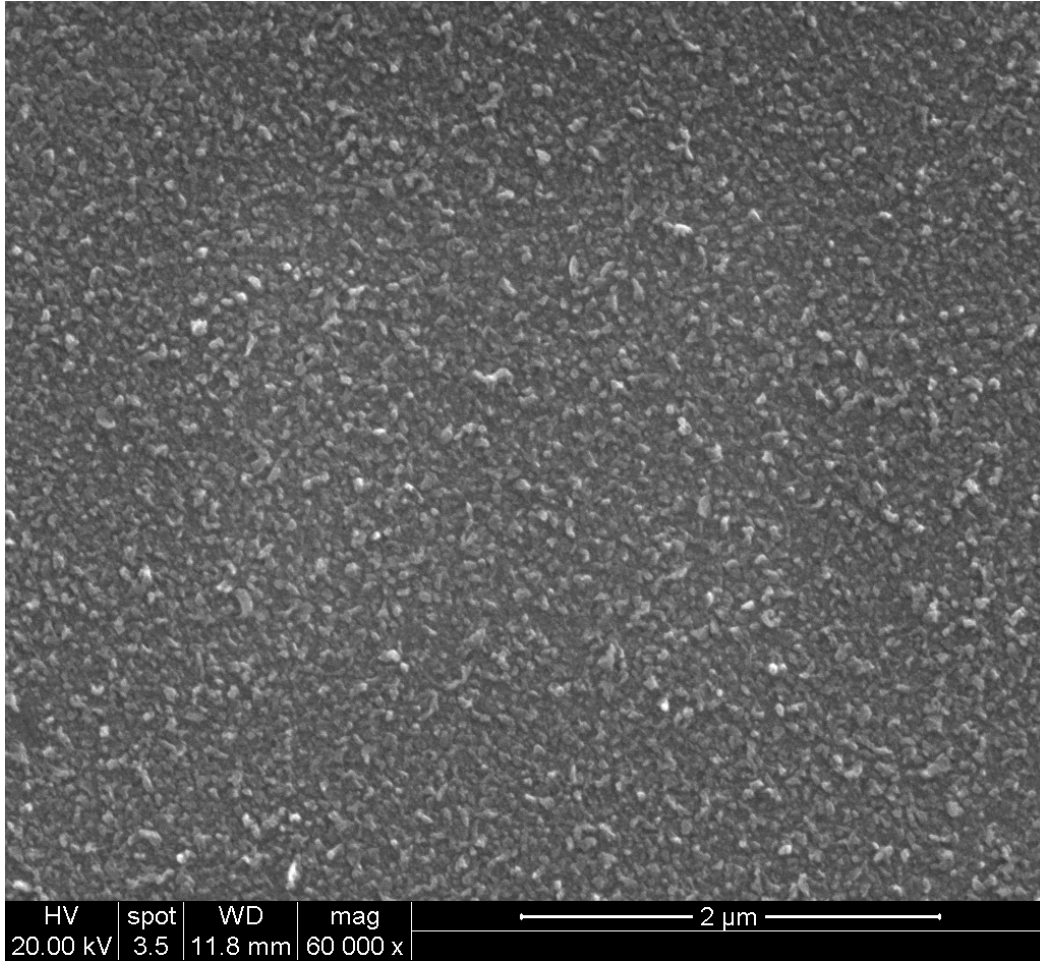

Figure S6| Large view SEM image of surface morphology of selenized Mo/glass.

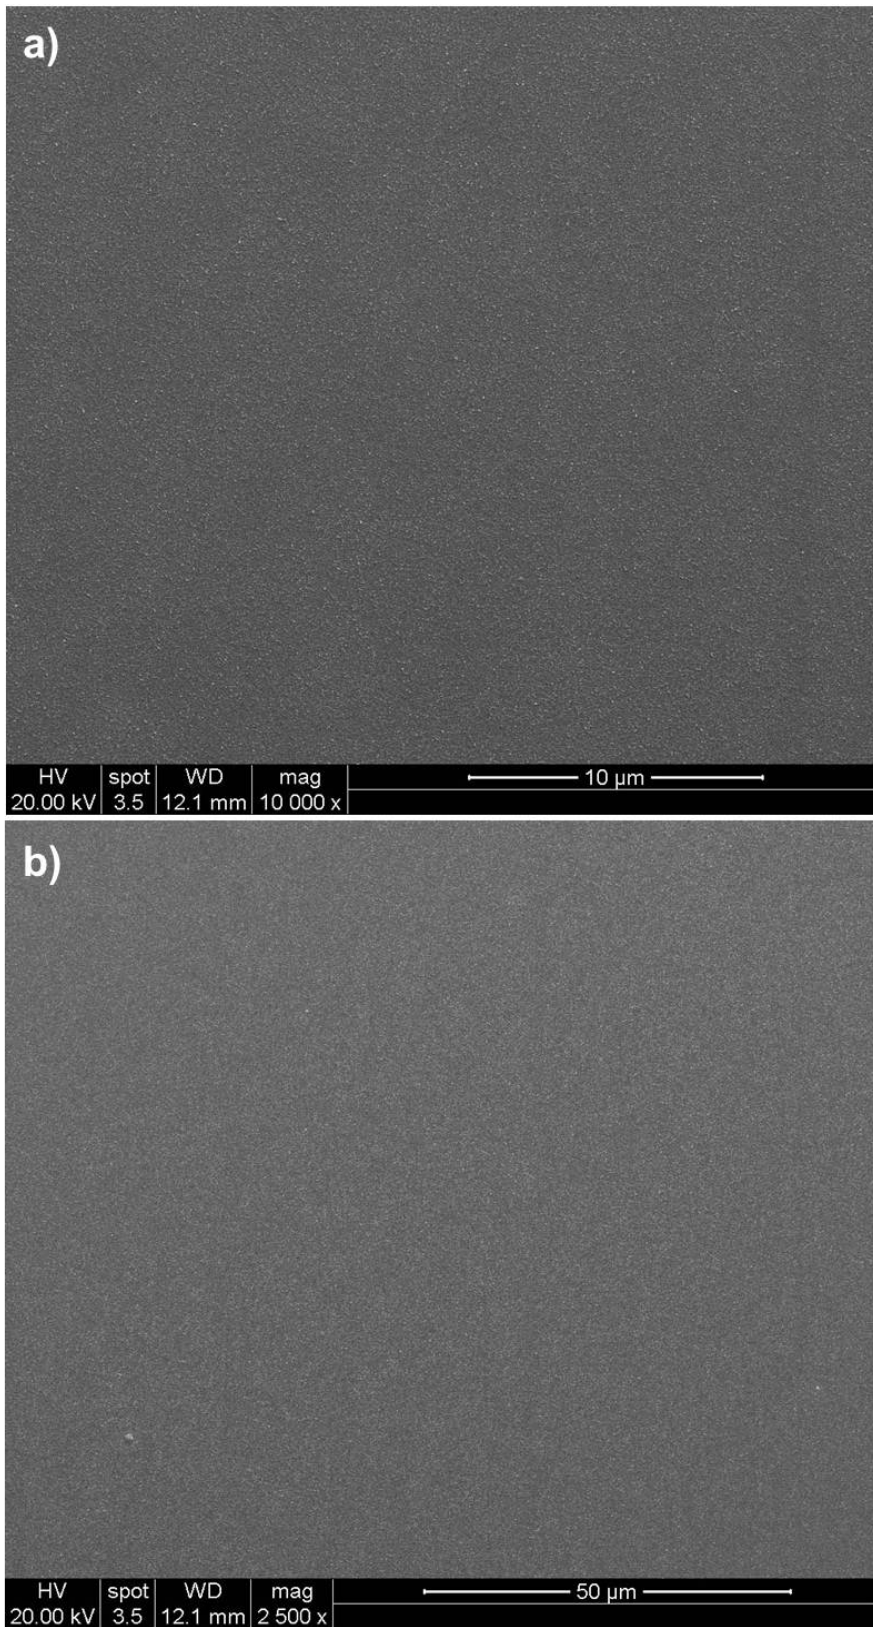

Figure S7| Low-magnification SEM images of surface morphology of selenized Mo/glass.

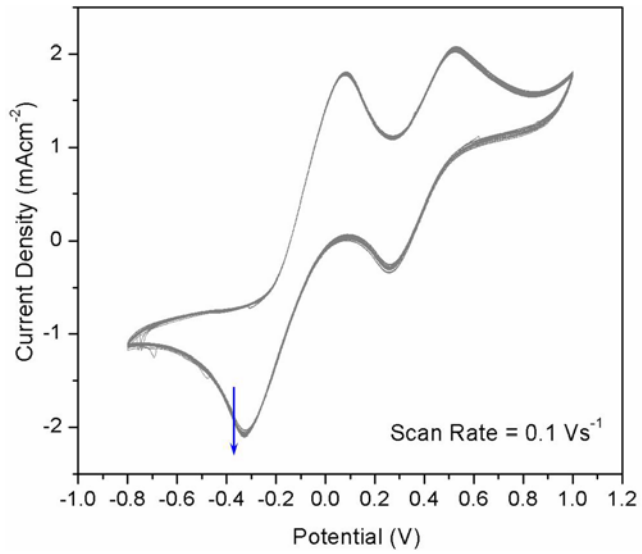

Figure S8| Consecutive CV scanning of the MoSe<sub>2</sub>/Mo electrode for 20 cycles, the small alternations in some position is due to the perturbation of the equipment upon long time operation.



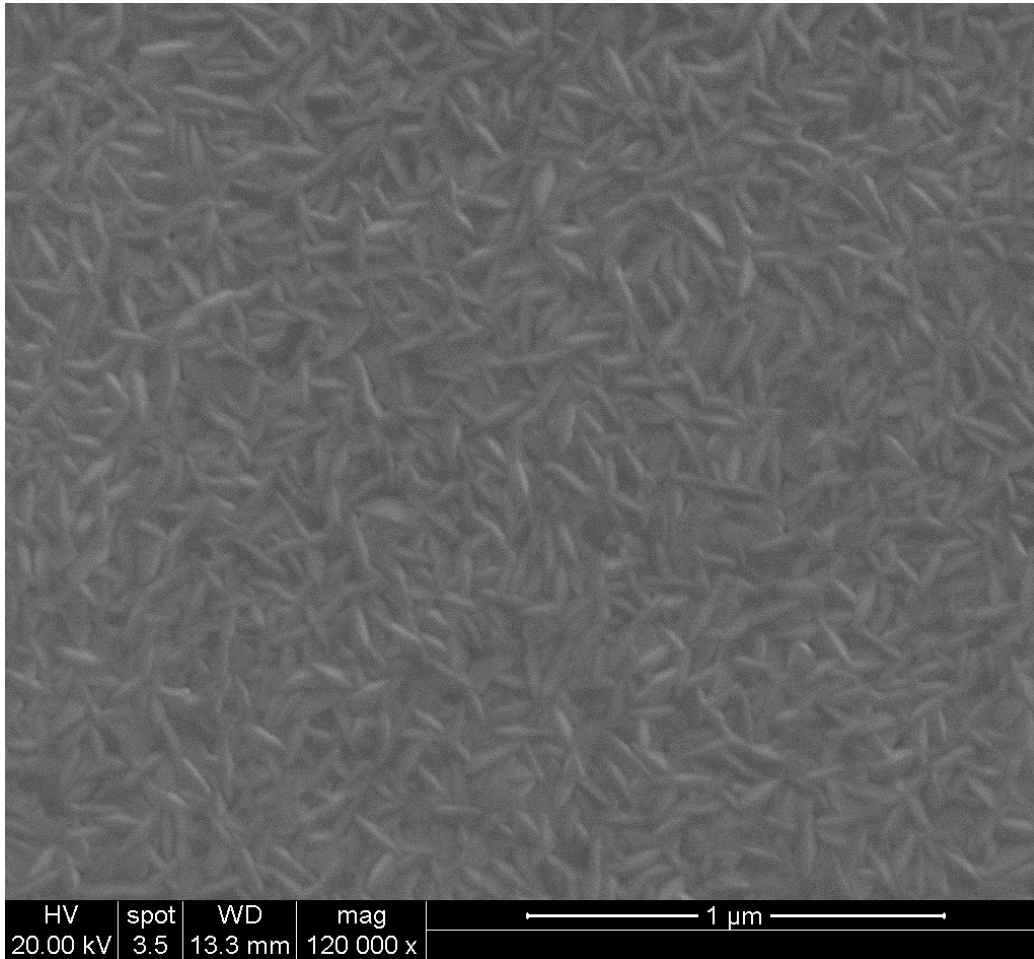

Figure S9| SEM image of the as-prepared Mo substrate.
